# Supplementary material
Source: publisher site journal article supplement (https://www.kjim.org/upload/media/kjim-2023-265-Supplementary-Table-1.pdf)
Supplement: Supplementary file 1 [file kjim-2023-265-Supplementary-Table-1.pdf]

**Supplementary Table 1. ADL and IADL**

| Score | ADL                    | IADL                       |
|-------|------------------------|----------------------------|
| 0-1   | Dressing               | Grooming                   |
| 0-1   | Washing face and hands | Doing housework            |
| 0-1   | Bathing                | Preparing meals            |
| 0-1   | Eating                 | Doing Laundry              |
| 0-1   | Transferring           | Taking a short trip        |
| 0-1   | Toileting              | Using transportation       |
| 0-1   | Continence             | Shopping                   |
| 0-1   |                        | Ability to handle finances |
| 0-1   |                        | Using a telephone          |
| 0-1   |                        | Taking medications         |

ADL, Activities of Daily Living; IADL, Instrumental Activities of Daily Living.

The ADL scale consists of 7 items (dressing, washing, bathing, eating, transferring, Toileting, and continence), with a score for each item of 0 (unable to do the activity) or 1 (able to do the activity). Total score ranges from 0 (fully dependent) to 7 (fully independent). The IADL scale consists of 10 items (grooming, doing housework, preparing meals, doing laundry, taking a short trip, using transportation, shopping, ability to handle finances, using a telephone, taking medicines), with a score for each item of 0 (dependent) or 1 (independent). Total score ranges from 0 (highly dependent) to 10 (highly independent).
